# Supplementary material
Source: PubMed Central journal article supplement (PMC5922979)
Supplement: NIHMS959201-supplement-S1S2.pdf [file NIHMS959201-supplement-S1S2.pdf]

**Cell, Volume 166**

**Supplemental Information**

**Neuroendocrine Coordination of Mitochondrial**

**Stress Signaling and Proteostasis**

**Kristen M. Berendzen, Jenni Durieux, Li-Wa Shao, Ye Tian, Hyun-eui Kim, Suzanne Wolff, Ying Liu, and Andrew Dillin**

**Table S1. Statistics for Lifespans**

| Strain                                          | Median (days) | 75 <sup>th</sup> Percentile (days) | Total # Animals Died/Total | P-value  |
|-------------------------------------------------|---------------|------------------------------------|----------------------------|----------|
| Figure 3 Lifespan                               |               |                                    |                            |          |
| <b>Control <i>hsp-6p::GFP</i></b>               | <b>19</b>     | <b>21</b>                          | <b>120/139</b>             |          |
| Q40; <i>hsp-6p::GFP</i>                         | 19            | 21                                 | 120/135                    | <0.4823  |
| <i>atfs-1(gk3094)</i> ; <i>hsp-6p::GFP</i>      | 17            | 20                                 | 94/130                     | <0.4973  |
| Q40; <i>hsp-6p::GFP</i> ; <i>atfs-1(gk3094)</i> | 15            | 18                                 | 112/140                    | <0.0001* |
| Lifespan Trial #2                               |               |                                    |                            |          |
| <b>Control <i>hsp-6p::GFP</i></b>               | <b>13</b>     | <b>17</b>                          | <b>84/125</b>              |          |
| Q40; <i>hsp-6p::GFP</i>                         | 15            | 18                                 | 87/125                     | <0.1650  |
| <i>atfs-1(gk3094)</i>                           | 15            | 18                                 | 88/125                     | <0.1145  |
| Q40; <i>hsp-6p::GFP</i> ; <i>atfs-1(gk3094)</i> | 10            | 11                                 | 71/125                     | <0.0001* |
| <b>Control N2</b>                               | <b>15</b>     | <b>17</b>                          | <b>103/125</b>             |          |
| Q40                                             | 15            | 16                                 | 70/125                     | <0.7834  |
| Lifespan Trial #3                               |               |                                    |                            |          |
| <b>Control <i>hsp-6p::GFP</i></b>               | <b>14</b>     | <b>17</b>                          | <b>87/114</b>              |          |
| Q40; <i>hsp-6p::GFP</i>                         | 20            | 22                                 | 70/115                     | <0.0001* |
| <i>atfs-1(gk3094)</i>                           | 13            | 14                                 | 42/126                     | <0.1463  |
| Q40; <i>hsp-6p::GFP</i> ; <i>atfs-1(gk3094)</i> | 14            | 17                                 | 35/117                     | <0.7896  |
| <b>Control N2</b>                               | <b>19</b>     | <b>21</b>                          | <b>83/112</b>              |          |
| Q40                                             | 17            | 19                                 | 50/119                     | <0.2164  |
| Lifespan Trial #4                               |               |                                    |                            |          |
| <b>Control N2</b>                               | <b>15</b>     | <b>16</b>                          | <b>70/125</b>              |          |
| Q40                                             | 15            | 17                                 | 103/125                    | <0.0755  |
| <i>atfs-1(gk3094)</i>                           | 15            | 18                                 | 80/125                     | <0.1507  |

**Table S2. Primer Sequences**

| <b>Sequence-Based Reagents</b>                                                            |                           |     |
|-------------------------------------------------------------------------------------------|---------------------------|-----|
| <i>spg-7</i> target sequence:<br>ACCGAATTTCTCAGCTGCTT                                     | This paper                | N/A |
| <i>cco-1</i> target sequence:<br>ATCCACTTGAGCACGCTAC                                      | This paper                | N/A |
| <i>spg-7</i> indel Forward primer:<br>TGTTTGCGCAGTGCATGATT                                | This paper                | N/A |
| <i>spg-7</i> indel Reverse primer:<br>AAAATACGGCCCCGGAAACC                                | This paper                | N/A |
| <i>enol-1</i> F :5' GCAGTTCCATCTGGAGCTTCTACTG<br>3', R :5' GTTGATGTTCCGAGACGGCCTTG 3'     | (Nargund et al.,<br>2015) | N/A |
| <i>ldh-1</i> F :5'; GATAAGTTGAAGGGAGAGATGATG 3';<br>R :5'; GACGAGCACCTGCTGTCCTACTAC 3'    | (Nargund et al.,<br>2015) | N/A |
| <i>aco-2</i> F: 5' -GAGCCACTTGGCTGGACCTG -3'; R:<br>5'GTACGACTTCGGCTCGAATTTACTG 3'        | (Nargund et al.,<br>2015) | N/A |
| <i>cts-1</i> F: 5' -GCTATTCGCAGACTTATCACCAAG -3';<br>R: 5'; TGTGGGCTGGGATCTTCTTG 3';      | (Nargund et al.,<br>2015) | N/A |
| <i>nuo-4</i> F: 5' -CAAGGAGTTGTGCTCGAACG- 3'; R:<br>5'; GTAGTTGAGGAAGAGCATTTTTACG- 3'     | (Nargund et al.,<br>2015) | N/A |
| <i>sdha-1</i> F: 5'-TTACCAGCGTGCTTTCGGAG- 3'; R: 5'<br>AGGGTGTGGAGAAGAGAATGACC- 3'        | (Nargund et al.,<br>2015) | N/A |
| <i>ucr-2.1</i> F: 5' -CGCGCCCATCTGGAAGT- 3'; R: 5'-<br>GAACTCCAGCAGATTTGGCTG- 3'          | (Nargund et al.,<br>2015) | N/A |
| <i>cyc-2.1</i> F: 5'-CGGAGTTATCGGACGTACATCAG- 3';<br>R: 5'-GTCTCGCGGGTCCAGACG- 3'         | (Nargund et al.,<br>2015) | N/A |
| <i>cco-1</i> F: 5'-GCTGGAGATGATCGTTACGAG- 3'; R:<br>5'-GCATCCAATGATTCTGAAGTCG- 3'         | (Nargund et al.,<br>2015) | N/A |
| <i>atp-3</i> F: 5'-GTCCTCGACCCAACTCTCAAG- 3'; R:<br>5'-GTCCAAGGAAGTTTCCAGTCTC- 3'         | (Nargund et al.,<br>2015) | N/A |
| <i>nuaf-1</i> F: 5'-GAGACATAACGAGGCTCGTGTTG- 3';<br>R: 5'-GAAGCCTTCTTTCCAATCACTATCG- 3'   | (Nargund et al.,<br>2015) | N/A |
| <i>lpd-8</i> F: 5'-GTCAACAGCTTCTCCCAGACG- 3'; F:<br>5'-GCTTCACTCCGTCGACTCG- 3'            | (Nargund et al.,<br>2015) | N/A |
| Y17G9B.5 F: 5'-<br>GTGCAGTGAAGGTTCTAGATGAAATG- 3'; F: 5';<br>CTTTGGCATCCAATAGAGCATAACG-3' | (Nargund et al.,<br>2015) | N/A |
| ND-1 F: 5' -AGCGTCATTT ATTGGGAAGAAGAC-3';<br>R: 5' -AAGCTTGTGCTAATCCCATAAATGT- 3'         | (Nargund et al.,<br>2015) | N/A |
| <i>act-3</i> F: 5' -TGCGACATTGATATCCGTAAGG- 3'; R:<br>5' -GGTGGTTCTCCGAAAGAA- 3'          | (Nargund et al.,<br>2015) | N/A |
