# Supplementary material
Source: PubMed Central journal article supplement (PMC5922979)
Supplement: NIHMS959201-supplement-supplement_1.pdf [file NIHMS959201-supplement-supplement_1.pdf]

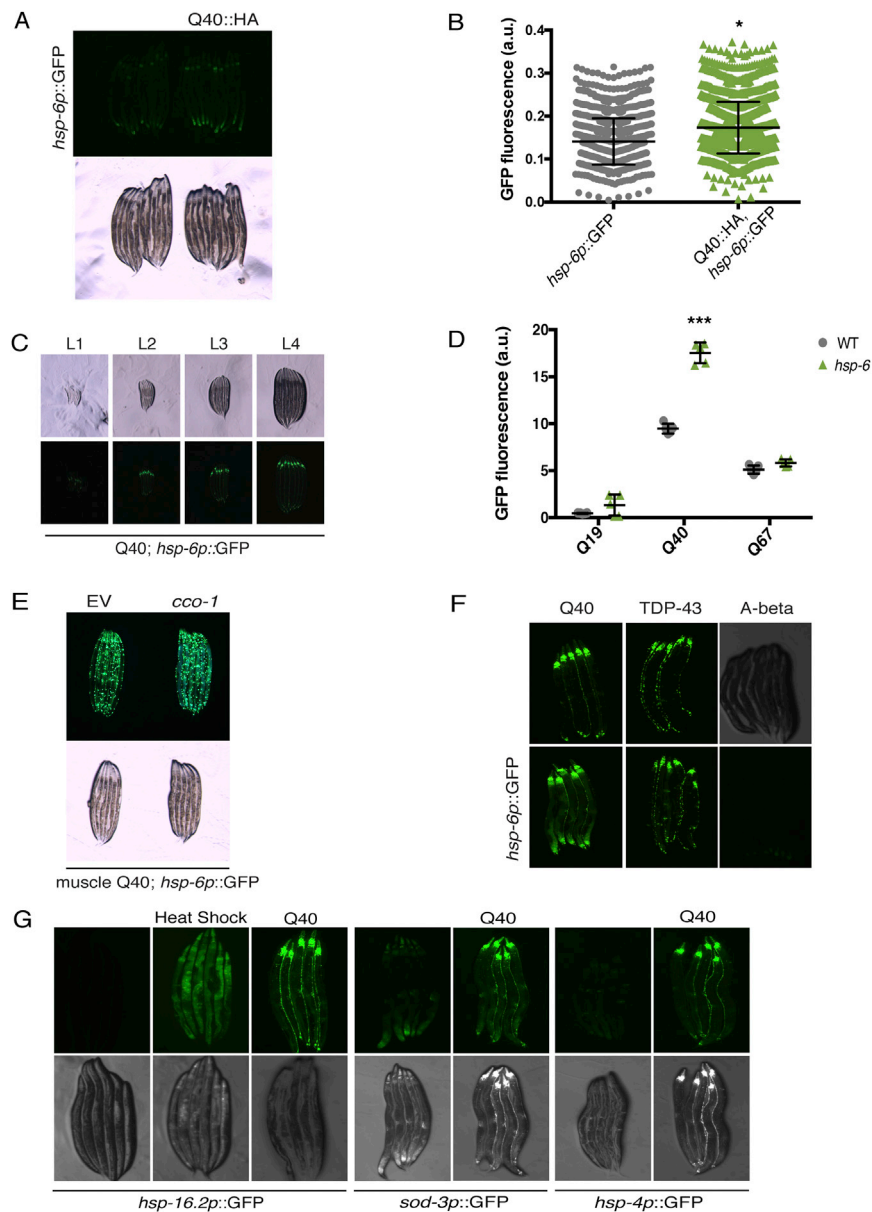

**Figure S1. PolyQ Expression Specifically Induces the UPR<sup>mt</sup> during Adulthood and Is Specific for Neuronal Q40 Lengths, Related to Figure 1**

(A) Photomicrographs showing *hsp-6p::GFP* reporter induction in animals expressing *rgef-1p::polyQ40::HA*.

(B) Biosorter fluorescence measurement for *rgef-1p::polyQ40::HA* animals from (A) (Mean  $\pm$  SD for samples of 1,200–1,500 worms,  $p < 0.0001$  by Student's *t* test).

(C) Photomicrographs showing *hsp-6p::GFP* reporter induction in animals expressing *rgef-1p::polyQ40::YFP* during the developmental stages indicated.

(D) ImageJ quantification of whole-animal *hsp-6p::GFP* expression in Figure 1A (Mean  $\pm$  SEM for samples of  $n = 30$ –60 worms).

(E) Photomicrographs showing *hsp-6p::GFP* reporter induction in animals expressing *unc-54p::polyQ35::YFP* in the muscle. Cytochrome c oxidase (*cco-1*) RNAi treatment serves as a positive control for *hsp-6p::GFP* induction.

(F) Photomicrographs showing *hsp-6p::GFP* reporter induction in animals expressing either TDP-43 driven by the pan-neuronal specific *snb-1* promoter or expressing cytoplasmic A $\beta$  under the *rgef-1* promoter. Top panels show animals without the reporter and bottom panels show animals expressing the *hsp-6p::GFP* reporter.

(G) Photomicrographs showing heat shock *hsp-16.2p::GFP*, *sod-3p::GFP*, or *hsp-4p::GFP* reporter induction in animals expressing *rgef-1p::polyQ40::YFP*. A positive control of heat shock at 33°C is shown.

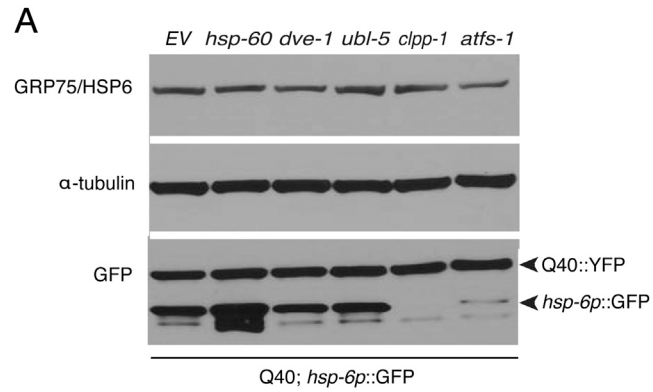

**Figure S2. Changes in Protein Expression with RNAi to UPR<sup>mt</sup> Components, Related to Figure 2**

(A) Immunoblot analysis of the polyQ40 strains grown on either empty vector control, *hsp-60*, *dve-1*, *ubl-5*, *clpp-1*, or *atfs-1* RNAi from hatch using antibodies against GFP and GRP75/HSP-6.

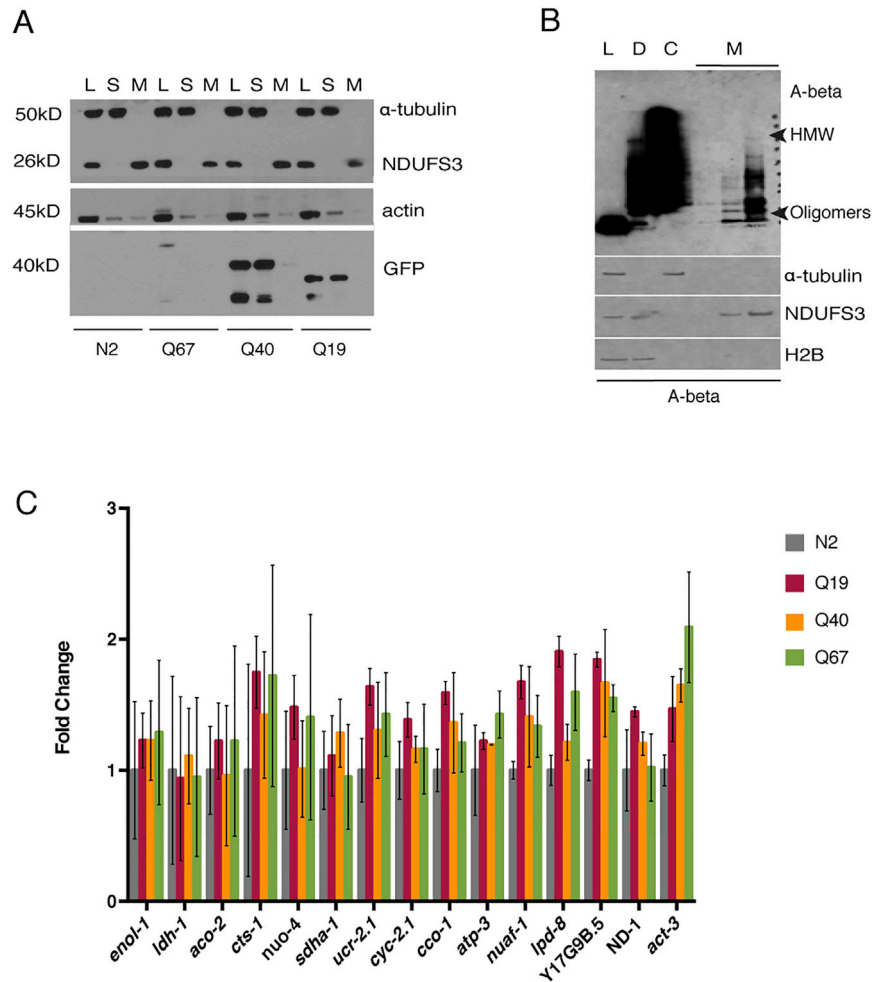

**Figure S3. Q19 and High Molecular Weight A $\beta$  Species Do Not Associate with Mitochondria and Evaluation of Gene Expression Changes in PolyQ Strains, Related to Figure 3**

(A) Immunoblot analysis of day 1 adult wild-type, *rgef-1p::polyQ40::YFP*, *rgef-1p::polyQ19::YFP* or *rgef-1p::polyQ67::YFP* transgenic animals after separation of lysate (L) and fractionation into postmitochondrial supernatant (S) and mitochondrial pellet (M). Anti-GFP recognizes expression of polyQ::YFP in the indicated fractions. The lower band is cleaved YFP. Endogenous NDUFS3 serves as a mitochondrial marker and  $\alpha$ -tubulin and  $\beta$ -actin as cytoplasmic markers.

(B) Immunoblot analysis of adult wild-type animals and strains expressing A $\beta_{1-42}$  localized to the muscle. Fractions depicted as above, and D = debris and C = cytoplasmic fraction. Anti-A $\beta$  recognizes expression of A $\beta_{1-42}$  in the indicated fractions, with both high molecular weight (HMW) and oligomeric species indicated. Endogenous NDUFS3 serves as a mitochondrial marker, H2B a nuclear, and  $\alpha$ -tubulin a cytoplasmic marker.

(C) RT-QPCR analysis of whole-animal transcript levels in the three polyQ strains normalized to wild-type animals. Transcripts for genes involved in glycolysis/gluconeogenesis (*enol-1*, *ldh-1*), TCA-cycle (*aco-2*, *cts-1*), OX/PHOS (*nuo-4*, *sdha-1*, *ucr-2.1*, *cyc-2.1*, *cco-1*, and *atp-3*), proteostasis (*nuaf-1*, *lpd-8*, *Y17G9B.5*) and mitochondrial replication (*ND-1*, *act-3*) were assessed. Graph represents mean  $\pm$  SEM for technological replicates.

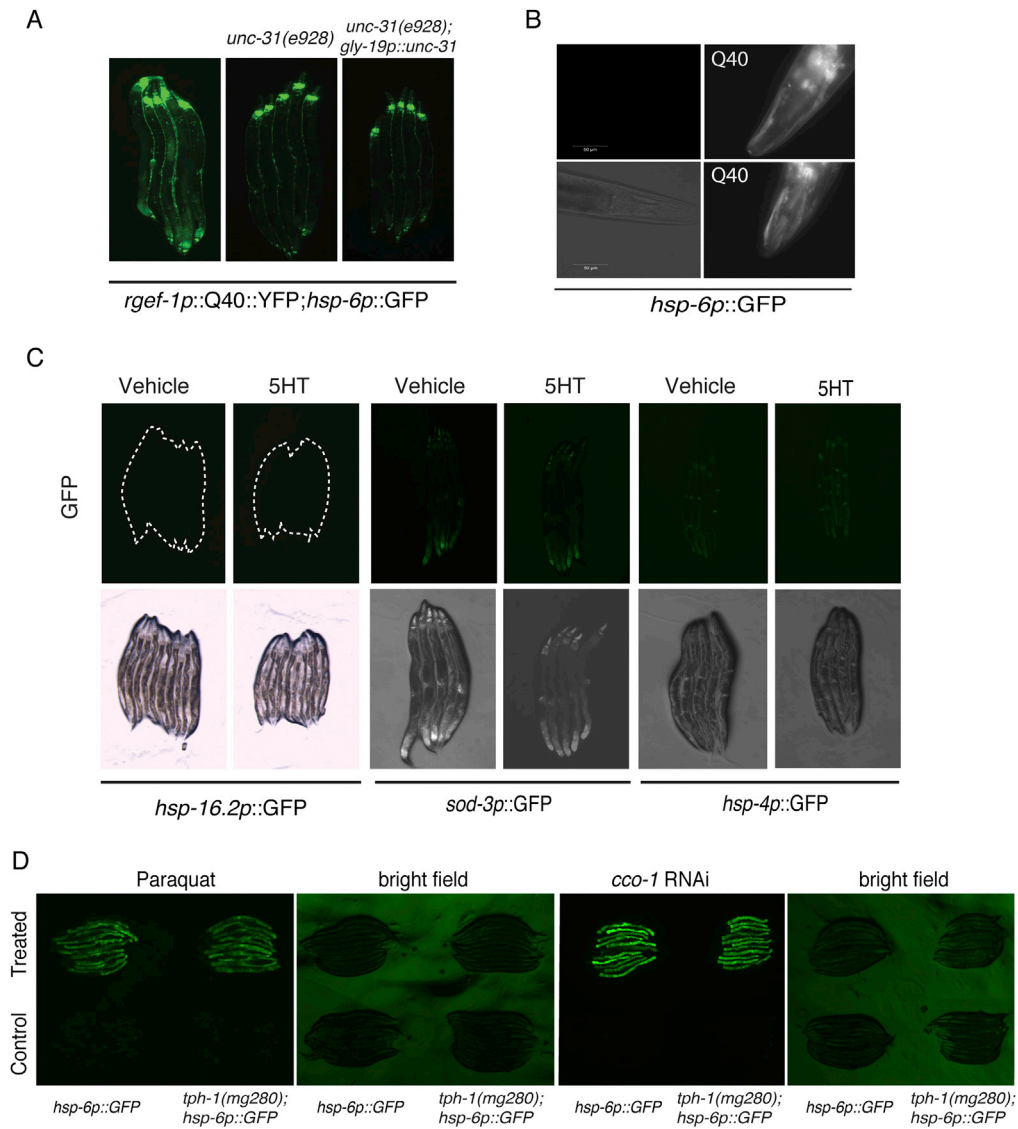

**Figure S4. The Effect of *unc-31* Signaling Is Specific to the Neurons and Serotonin Specifically Regulates the Cell-Non-Autonomous UPR<sup>mt</sup>, Related to Figure 4**

(A) Photomicrographs depicting *hsp-6p::GFP* reporter response in *rgef-1p::polyQ40::YFP; hsp-6p::GFP;unc-31(e928)* animals with or without the addition of intestinal specific rescue of *unc-31* via a *gly-19* promoter.

(B) Photomicrographs of the head regions of *hsp-6p::GFP* reporter strains and the *rgef-1p::polyQ40::HA; hsp-6p::GFP* strain. C) Photomicrographs of *rgef-1p::polyQ40::YFP; hsp-6p::GFP* animals crossed to the *hsp16.2p::GFP* and *hsp-4p::GFP* strains and treated with 5 mM 5-HT. D) Photomicrographs of the *hsp-6p::GFP* and *tph-1(mg280); hsp-6p::GFP* strains after exposure to either Paraquat (2.5 mM) or *cco-1* RNAi.

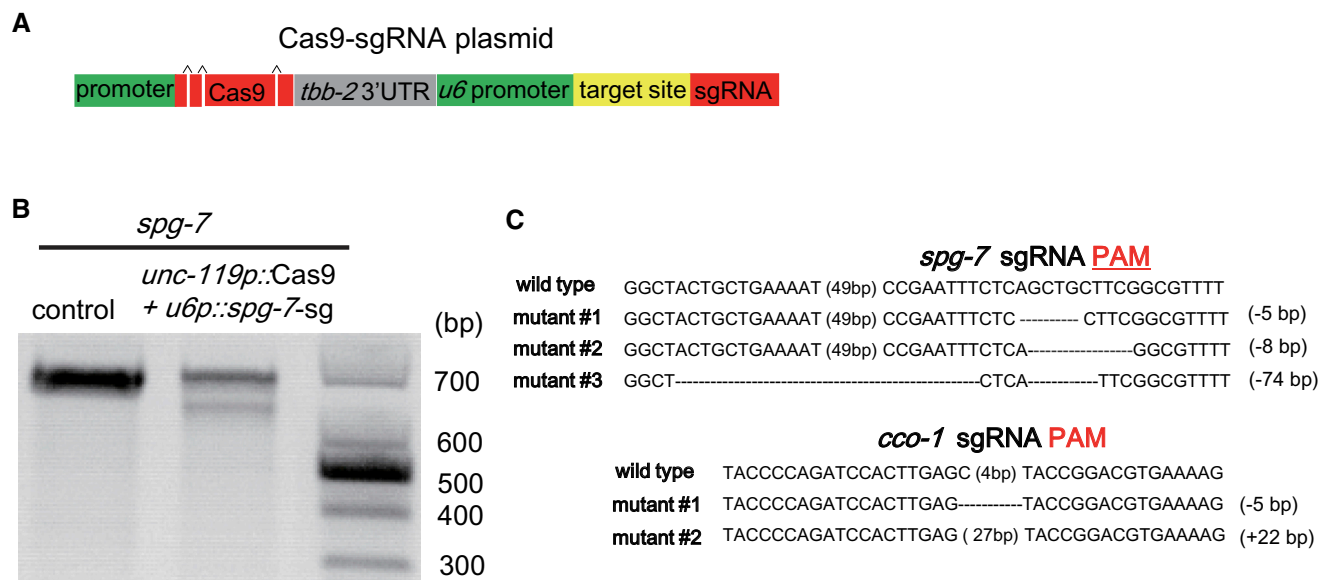

**Figure S5. *spg-7* Deletion in CRISPR-Cas9 Model Related to Figure 6**

(A) A schematic graph of the Cas9-sgRNA plasmid.

(B) A representative DNA gel of the T7E1 assay for *spg-7* PCR products amplified from genomic DNA of *hsp-6p::GFP* worms (left) or *unc-119p::Cas9+u6p::spg-7-sg; hsp-6p::GFP* worms with non-autonomous UPR<sup>mt</sup> (right).

(C) The representative sequence alignments of the *spg-7* and *cco-1* genes in wild-type and mutant animals. The PAM sequence is labeled in red. The numbers in parentheses represent the number of bases not shown. Dash indicates deletion. The number of deleted (-) or inserted (+) bases is shown on the right of each indel.
